# Supplementary material for: Green synthesis of Cd and Cd/Zr-dual doped CeO2 nanoparticles for enhanced photocatalysis and latent fingerprint applications
Source: Research Square preprint supplement (doi:10.21203/rs.3.rs-8561410/v1), 2026-01-28
Supplement: Supplementary file 1 [file 556fb56f14574624ab38e4f3.docx]

**Highlights**

- Cd and Zr/Cd co-doped cerium oxide nanoparticles were synthesized via green solution combustion method.
- The Cd and Zr/Cd-dual doped CeO2 nanocomposites were investigated for the degradation of rose bengal (RB) dye under visible light irradiation.
- Photodegraded water has been successfully reused for plant growth, showing comparable results to pure water.
- The clear ridge patterns demonstrate the effectiveness of the synthesized NPs for LFP detection and forensic use.
