# Supplementary figures and images for: Green synthesis of Cd and Cd/Zr-dual doped CeO2 nanoparticles for enhanced photocatalysis and latent fingerprint applications
Source: Research Square preprint supplement (doi:10.21203/rs.3.rs-8561410/v1), 2026-01-28

**Graphical abstract**


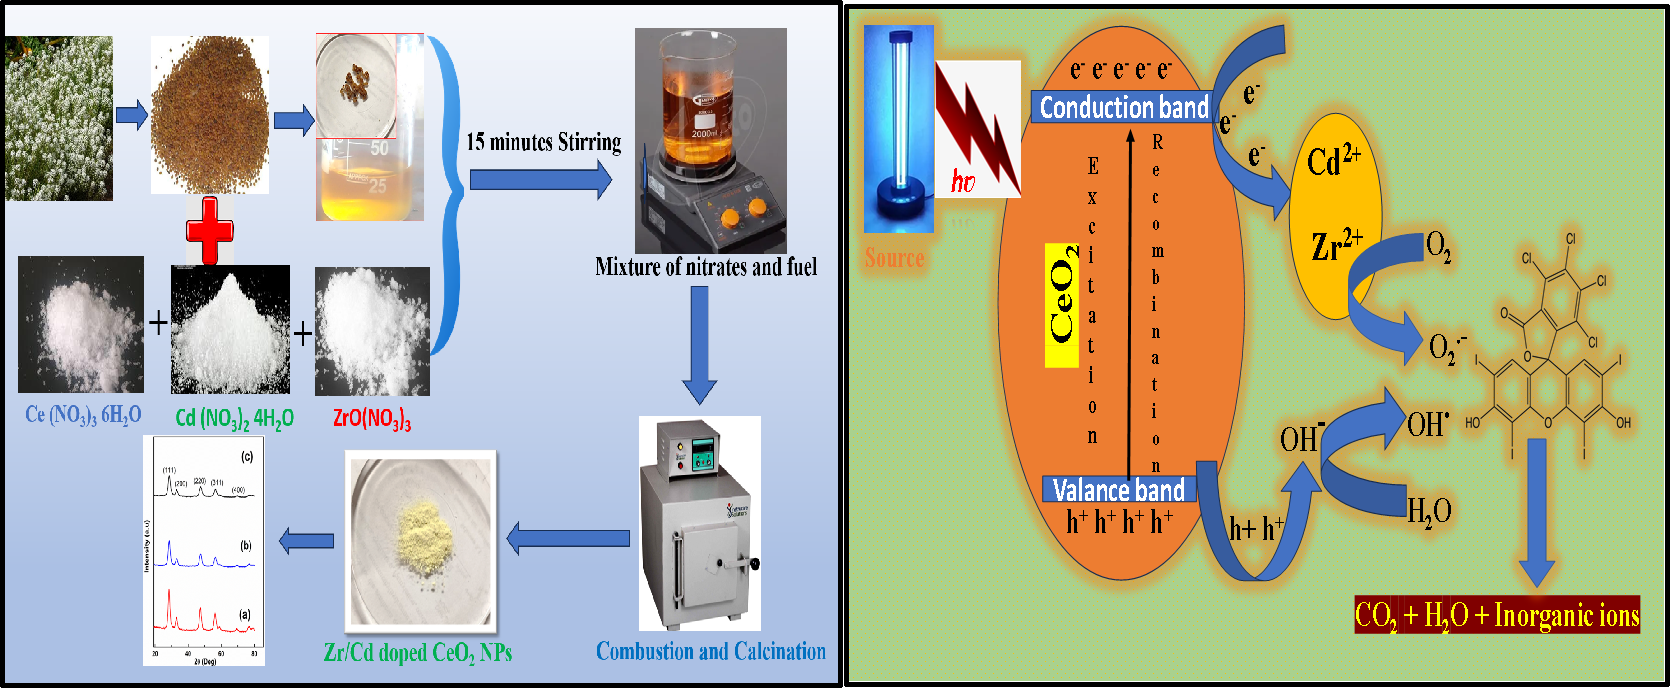

Supplement: Supplementary file 2 [file 8833c8316a2c4925a5e59d10.docx]
